1 **Spatial relationships of intra-lesion heterogeneity in *Mycobacterium tuberculosis***  
2 **microenvironment, replication status, and drug efficacy**

3

4 Richard C. Lavin<sup>1,2</sup> and Shumin Tan<sup>1,2\*</sup>

5

6 <sup>1</sup>Department of Molecular Biology and Microbiology, Tufts University School of Medicine,  
7 Boston, Massachusetts, USA.

8 <sup>2</sup>Graduate Program in Molecular Microbiology, Graduate School of Biomedical Sciences, Tufts  
9 University, Boston, Massachusetts, USA.

10

11 \* Corresponding author

12 E-mail: [shumin.tan@tufts.edu](mailto:shumin.tan@tufts.edu)

13 **ABSTRACT**

14 A hallmark of *Mycobacterium tuberculosis* (Mtb) infection with critical impact on disease  
15 development and outcome is the marked heterogeneity that exists, spanning differences in lesion  
16 types to changes in microenvironment as the infection progresses<sup>1-7</sup>. A mechanistic understanding  
17 of how this heterogeneity affects Mtb growth and treatment efficacy necessitates single bacterium-  
18 level studies in the context of intact host tissue architecture; however, such an evaluation has been  
19 technically challenging. Here, we exploit fluorescent reporter Mtb strains and the C3HeB/FeJ  
20 murine model in an integrated imaging approach to study microenvironment heterogeneity within  
21 a single lesion *in situ*, and analyze how these differences relate to non-uniformity in Mtb  
22 replication state, activity, and drug efficacy. We show that the pH and chloride environments differ  
23 spatially in a caseous necrotic lesion, with increased acidity and chloride levels in the lesion cuff  
24 versus the necrotic core. Conversely, a higher percentage of Mtb in the necrotic core versus the  
25 lesion cuff were in an actively replicating state, and correspondingly active in transcription and  
26 translation. Finally, examination of three first-line anti-tubercular drugs showed that efficacy of  
27 isoniazid was strikingly poor against bacteria in the lesion cuff. Our study reveals spatial  
28 relationships of intra-lesion heterogeneity, sheds light on important considerations in the  
29 development of anti-tubercular treatment strategies, and establishes a foundational framework for  
30 Mtb infection heterogeneity analysis at the single cell level *in situ*.

31

32 **MAIN TEXT**

33 The ability to effectively treat *Mycobacterium tuberculosis* (Mtb) is significantly impeded  
34 by the marked heterogeneity of the infection across multiple levels, including non-uniformity in  
35 local microenvironments<sup>1-6</sup>. This heterogeneity extends not just between lesions but within a single

36 lesion; for example, matrix-assisted laser desorption/ionization mass spectrometry studies have  
37 demonstrated variation in drug penetration into caseous necrotic lesions<sup>8</sup>. Further, pH  
38 measurements of liquefying caseum obtained from caseous necrotic lesions in both C3HeB/FeJ  
39 mice and guinea pigs have indicated the neutral pH of this material<sup>8,9</sup>, which has been contrasted  
40 with the slightly acidic pH of the macrophage intraphagosomal environment that is a major niche  
41 of the bacterium<sup>10-12</sup>. Of note, the first-line anti-tubercular drug pyrazinamide (PZA) shows  
42 increased efficacy in acidic conditions<sup>13-15</sup>. The neutral pH of the caseous material has thus been  
43 implicated as a contributing reason for the lack of PZA efficacy sometimes observed in C3HeB/FeJ  
44 mice where caseous necrotic lesion types are formed, versus the uniform efficacy observed in  
45 BALB/c mice, which do not form caseous necrotic lesions<sup>8,9</sup>.

46         The critical impact of within-host heterogeneity on infection and treatment outcome  
47 dictates the need to functionally characterize Mtb infection *in vivo* at the single bacterium level,  
48 within spatial tissue context. However, the technical hurdles associated with accomplishing such  
49 studies has meant a continued dearth in our knowledge of what Mtb actually “sees” during  
50 infection at the single bacterium level, and how this may be non-uniform within a host or lesion.  
51 In addition, we lack vital information regarding how bacterial growth status may vary in different  
52 sublocations within a host. To overcome these challenges and address these key questions, we  
53 sought to develop an integrated imaging approach that enables analysis of single bacteria in  
54 individual lesions within an infected lung. To establish this approach, we infected C3HeB/FeJ  
55 mice with Mtb constitutively expressing mCherry and harvested the lungs 6 weeks post-infection.  
56 The utility of C3HeB/FeJ mice as a Mtb infection model has been increasingly appreciated due to  
57 its formation of a range of lesion types including caseous necrotic lesions, and it is now frequently  
58 used in anti-tubercular drug studies<sup>8,9,16-21</sup>. By employing a broad xy-plane tiled imaging approach

59 coupled with antibody staining against host markers, we were able to distinguish the three lesion  
60 types previously described via histological studies in the C3HeB/FeJ murine Mtb infection model  
61 (Supplementary Fig. 1)<sup>4,7</sup>. Of particular interest here, highly structured type I caseous necrotic  
62 lesions were distinguished by the fibrous collagen I-rich cuff containing CD68-positive  
63 macrophages that rings the caseous necrotic core (Supplementary Fig. 1a). Very rare neutrophil-  
64 dominant type II lesions were discriminated by Ly6G staining for neutrophils (Supplementary Fig.  
65 1b), while macrophage-rich type III lesions were differentiated with CD68 staining of  
66 macrophages (Supplementary Fig. 1c). Broad xy-plane tiled imaging provides the breadth required  
67 to capture large type I lesions in their entirety (Supplementary Fig. 1a), with subsequent targeted  
68 3-dimensional imaging and reconstruction enabling single cell-resolution visualization of the  
69 fluorescent bacteria (Supplementary Fig. 1, insets), setting the stage for analysis of intra-lesion  
70 sublocation environment and Mtb replication status. We focus here on type I caseous necrotic  
71 lesions, due to its association with heterogeneity in drug penetration and Mtb drug response<sup>8,9,16-</sup>  
72 <sup>18,22</sup>, and its highly structured nature.

73 We first sought to directly visualize differences in the pH and chloride (Cl<sup>-</sup>)  
74 microenvironment within type I caseous necrotic lesion sublocations, given the reported neutral  
75 pH of liquifying caseum<sup>8,9</sup>, and our previous work demonstrating the synergistic response of Mtb  
76 to pH and Cl<sup>-</sup>, which are linked cues during macrophage phagosomal maturation<sup>12</sup>. To do so, we  
77 infected C3HeB/FeJ mice with our pH/Cl<sup>-</sup>-responsive fluorescent reporter Mtb strain (Erdman  
78 *rv2390c*::GFP, *smyc*::mCherry) that fluoresces green upon bacterial exposure to acidic pH and/or  
79 high Cl<sup>-</sup> levels in the local environment, and expresses mCherry constitutively for visualization of  
80 all bacteria irrespective of local environment<sup>12,23</sup>. Comparison of Mtb present in the lesion cuff  
81 (predominantly present within macrophages) versus those present in the necrotic lesion core 6-8

82 weeks post-infection showed that the *rv2390c*'::GFP reporter signal was significantly higher in the  
83 bacteria present in the lesion cuff (Figs. 1a-1c), even as non-uniformity in reporter signal within  
84 each sublocation remained notable (Fig. 1c). Still more strikingly, binning the data for each lesion  
85 into different *rv2390c*'::GFP reporter signal ranges demonstrated the opposite distributions in  
86 physiological cues experienced by the two bacterial populations (Fig. 1d). Specifically, most Mtb  
87 present in the lesion cuff expressed high levels of *rv2390c*'::GFP reporter fluorescence (Figs. 1b-  
88 1d), indicative of an environment with more acidic pH and/or higher [Cl<sup>-</sup>], and in accord with the  
89 environment that would be expected in macrophage phagosomes<sup>12</sup>. Conversely, a majority of  
90 bacteria present in the necrotic core (extracellular Mtb) expressed lower levels of *rv2390c*'::GFP  
91 reporter signal (Figs. 1b-1d), indicative of an environment that is at a more neutral pH/has a lower  
92 [Cl<sup>-</sup>]. Our findings demonstrate at the single bacterium level within intact tissue that (i) the pH and  
93 chloride environment of the caseous necrotic core significantly differs from that experienced by  
94 Mtb present within the lesion cuff, and (ii) there remains non-uniformity in the local environment  
95 within each sublocation, even in the necrotic core.

96 To understand how this intra-lesion heterogeneity in microenvironment affects Mtb  
97 infection and treatment outcome, we next utilized our previously described single-strand DNA-  
98 binding protein (SSB)-GFP replication reporter to determine the replication status of Mtb in  
99 sublocations within a lesion. In this reporter strain, the Mtb SSB protein is translationally fused to  
100 GFP, driven by the native *ssb* promoter, and Mtb undergoing active DNA replication exhibit green  
101 foci, providing a proxy for revealing the replication status of a given bacterium<sup>23,24</sup>. Strikingly,  
102 analysis of lung tissue from a 6 week C3HeB/FeJ mice infection with the Erdman (SSB-GFP,  
103 *smyc*'::mCherry) reporter Mtb strain showed that a significantly greater percentage of Mtb present  
104 in the lesion core possessed SSB-GFP foci, indicative of actively replicating bacteria, versus Mtb

105 present in the lesion cuff (Fig. 2). This difference in overall replication status between Mtb present  
106 in the two lesion sublocations fits with the observed differences in local pH/[Cl<sup>-</sup>] (Fig. 1), with a  
107 higher percentage of replicating Mtb in the less harsh environment of the necrotic core. The  
108 replication state of Mtb can differentially impact drug efficacy and is implicated as a major  
109 contributor to the difficulties of successfully treating Mtb infection, as well as to the necessity for  
110 a prolonged treatment time course<sup>25-29</sup>. Yet actual demonstration of how Mtb replication status  
111 may differ within a single host during infection has been difficult to establish. Our data presented  
112 here provides the first direct evidence, to our knowledge, of how Mtb replication status differs not  
113 just within a single host but within a single lesion, and reveals how the non-uniformity in intra-  
114 lesion Mtb growth status is spatially related to lesion architecture.

115         The marked difference in bacterial replication state of Mtb residing in the caseous necrotic  
116 lesion core versus cuff prompted us to test a second, independent, approach to analyzing Mtb  
117 physiological state *in situ*. A dual fluorescent system where one fluorophore is placed under the  
118 control of an inducible promoter and a second spectrally distinct fluorophore is expressed  
119 constitutively has been successfully utilized to differentiate between transcriptionally active versus  
120 non-active Mtb in cultured macrophages<sup>30-32</sup>. We thus applied this strategy here *in vivo*, exploiting  
121 a reporter Mtb strain that carries on the chromosome a tetracycline inducible monomeric Kusabira  
122 Orange (mKO) construct, along with a constitutively expressed mCherry (P<sub>606</sub>'::mKO-tetON,  
123 *smyc*'::mCherry)<sup>30,33</sup>. As an initial test of the system, we infected C3HeB/FeJ mice with the  
124 Erdman (P<sub>606</sub>'::mKO-tetONm *smyc*'::mCherry) reporter Mtb strain for one week, before the  
125 provision of drinking water containing 5% sucrose ± 1 mg/ml doxycycline (dox) for one additional  
126 week. As shown in Figs. 3a-3c, in this short-term infection, dox treatment resulted in the expected  
127 induction of mKO fluorescence in Mtb, with Mtb in the mock-treated mice displaying no mKO

128 fluorescence, reinforcing the suitability of dox induction for *in vivo* Mtb studies<sup>34</sup>. To assess spatial  
129 intra-lesion differences in Mtb transcriptional/translational activity, we infected C3HeB/FeJ mice  
130 with the Erdman (P<sub>606</sub>'::mKO-tetON, *smyc*'::mCherry) reporter Mtb strain, allowing the infection  
131 to establish for 6 weeks prior to a one week exposure of the mice to drinking water containing 5%  
132 sucrose + 1 mg/ml dox, and harvesting of lung tissue. A first observation revealed by broad xy-  
133 plane imaging was that penetration of dox into the very central core of the caseous necrotic lesion  
134 appeared impeded, as no mKO signal could be observed in the bacteria present there  
135 (Supplementary Fig. 2). Nonetheless, as mKO signal could be observed within the more peripheral  
136 regions of the caseous necrotic core (Supplementary Fig. 2), analysis of the differences in mKO  
137 induction in Mtb present in the caseous necrotic core versus cuff was still feasible. Conspicuously,  
138 induction of mKO signal was observed in a much greater percentage of Mtb present in the  
139 peripheral regions of the caseous necrotic core versus those in the lesion cuff (Figs. 3d and 3e).  
140 Additionally, the variation in mKO signal induction within both the cuff and core bacterial  
141 populations was significantly greater than that observed in the short-term infection (compare Fig.  
142 3b and 3e). These data are consistent with the differences in bacterial replication status between  
143 Mtb present in the caseous necrotic core versus cuff, and further supports and highlights the impact  
144 of lesion sublocation on Mtb physiological state.

145         The observed differences in pH/Cl<sup>-</sup> environment and in bacterial replication status and  
146 transcriptional/translational activity between Mtb residing in the lesion core versus cuff raised the  
147 question of whether anti-tubercular drugs may have differential efficacy even within a single  
148 caseous necrotic lesion, separate from lesion penetration issues. To address this question, we  
149 infected C3HeB/FeJ mice for 6 weeks with the Erdman (SSB-GFP, *smyc*'::mCherry) reporter Mtb  
150 strain, before starting treatment via oral gavage with isoniazid (INH), PZA, or rifampicin (RIF)

151 for two weeks. A control set of infected mice were mock-treated with sterile water. Prominently,  
152 consistent with the better efficacy of INH against actively replicating bacteria<sup>35-37</sup>, INH treatment  
153 was significantly more effective against Mtb present in the caseous necrotic core versus the cuff,  
154 with a decrease in the percentage of Mtb with SSB-GFP foci compared to the mock-treated mice  
155 in the lesion core (Fig. 4). In contrast, no significant difference in the percentage of Mtb with SSB-  
156 GFP foci was observed between the INH and mock-treated groups in the lesion cuff (Fig. 4).

157 In the case of PZA, treatment decreased the percentage of actively replicating Mtb in both  
158 lesion sublocations compared to the mock-treated control (Fig. 4b). While PZA has been shown  
159 to more efficacious at acidic versus neutral pH<sup>14,15</sup>, and the caseous necrotic core has a more neutral  
160 pH (Fig. 1)<sup>8,9</sup>, it is now also appreciated that PZA can have efficacy in conditions that do not  
161 involve non-acidic pH values<sup>38,39</sup>. Our observations here support the concept that PZA has efficacy  
162 even within the caseous necrotic core, suggesting that the *in vivo* effect of PZA extends beyond a  
163 dependency on local acidic pH conditions. Finally, while RIF treatment showed efficacy against  
164 the Mtb population present in both lesion sublocations, it decreased the percentage of Mtb with  
165 SSB-GFP foci in the caseous necrotic core to a greater extent (Fig. 4b). RIF acts to inhibit Mtb  
166 transcription<sup>40-42</sup>, and our findings here are thus in accord with its mode of action.

167 Despite the consensus on the importance of heterogeneity on Mtb infection progression  
168 and treatment outcome, population-level readouts such as bacterial load and host cytokine levels  
169 continue to be the primary means by which these outcomes are measured. Our establishment here  
170 of an integrated imaging approach for *in situ* tissue analysis presents a method to overcome the  
171 significant hurdle of the single bacterium resolution required for analysis of Mtb *in vivo* infection  
172 heterogeneity. We delineate pH and Cl<sup>-</sup> as two facets of the microenvironment that exhibit intra-  
173 lesion heterogeneity during Mtb infection, findings that expand on previous studies reporting on



174 the neutral pH of liquefying caseum<sup>8,9</sup>, by providing single bacterium resolution analysis in both  
175 the lesion cuff and core sublocations, and revealing that heterogeneity in pH and [Cl<sup>-</sup>] is  
176 additionally present even within a lesion sublocation. Pimonidazole-based histological labeling  
177 has indicated the presence of hypoxia in the cuff of caseous necrotic lesions<sup>22,43</sup>, and we anticipate  
178 that other vital environmental signals such as nitric oxide are likely to also exhibit intra-lesion  
179 heterogeneity. Critically, our data directly demonstrate non-uniformity in bacterial replication  
180 status and transcriptional/translational activity within a single lesion, and reveal how these  
181 heterogeneous aspects are specifically linked to intra-lesion location. These differences in local  
182 environment and Mtb replication and activity further strikingly correlate to spatial differences in  
183 drug efficacy that exists even within a single caseous necrotic lesion. This work sets a foundational  
184 experimental method and framework for interrogation of (i) the heterogeneity in diverse aspects  
185 of Mtb infection biology within and between lesions in a single host, via the use of various reporter  
186 Mtb strains<sup>33,44-47</sup>, (ii) how drug treatment efficacy may differ in different sublocations within the  
187 lung/lesions and/or affect the local environment experienced by the bacterium, and (iii) how  
188 targeting of Mtb response to the local environment may change the extent of heterogeneity  
189 observed and thereby alter treatment success. We propose that future such single bacterium level  
190 studies in the context of intact tissue architecture, perturbing either regulators of bacterial  
191 environmental sensing and response or testing the effect of various therapeutic combinations, will  
192 build on the groundwork laid here and provide critical mechanistic insight into what drives  
193 infection heterogeneity, and how such non-uniformity impacts our ability to successfully treat Mtb  
194 infection.

195

196 **METHODS**

197 **Mtb strains and culture**

198 Reporter Mtb strains (*smyc*'::mCherry; *rv2390c*'::GFP, *smyc*'::mCherry; SSB-GFP,  
199 *smyc*'::mCherry) used for measuring differences in local microenvironment and replication status  
200 were in the Erdman background and have been previously described<sup>12,23</sup>. The P<sub>606</sub>'::mKO,  
201 *smyc*'::mCherry was as previously described<sup>30</sup>, except that the construct was placed in the  
202 background of the pDE43-MCK backbone, which is an integrating vector<sup>48</sup>. Bacteria were cultured  
203 in standing T25 flasks with filter caps, in 7H9 Middlebrook medium supplemented with OADC,  
204 0.05% Tween 80, and 50 µg/ml hygromycin B or 25 µg/ml kanamycin as needed, buffered at pH  
205 7.0 with 100 mM MOPS. Preparation of Mtb stocks for mice infection were as previously  
206 described<sup>23</sup>.

207

208 **Ethics statement**

209 All animal procedures followed standards set by the National Institutes of Health “Guide for the  
210 Care and Use of Laboratory Animals”. Animal protocols were reviewed and approved by the  
211 Institutional Animal Care and Use Committee at Tufts University (#B2019-10), in accordance with  
212 the Association for Assessment and Accreditation of Laboratory Animal Care, the US Department  
213 of Agriculture, and the US Public Health Service guidelines. Light anesthesia during infection and  
214 oral gavage administration of drugs was via exposure to 2% isoflurane delivered by a vaporizer  
215 system. Euthanasia utilized carbon dioxide gas with regulated flow, consistent with American  
216 Veterinary Medical Association guidelines.

217

218 **Mouse Mtb infections**

219 6-8 week old female C3HeB/FeJ wild type mice (Jackson Laboratory, Bar Harbor, ME) were  
220 intranasally infected with  $10^3$  colony forming units of appropriate reporter Mtb strain in 35  $\mu$ l of  
221 phosphate-buffered saline (PBS) containing 0.05% Tween 80, under light anesthesia with 2%  
222 isoflurane. Mice were sacrificed at 2, 6, 7, or 8 weeks post-infection, and the lungs fixed overnight  
223 in 4% paraformaldehyde (PFA) in PBS, before transfer and storage in PBS prior to analysis. For  
224 the  $P_{606}::mKO$ ,  $smyc::mCherry$  reporter strain infection, infections were allowed to establish for  
225 one or six weeks, before provision of the mice with water containing 5% sucrose  $\pm$  1 mg/ml  
226 doxycycline, with one additional water change during the one week treatment period. For the drug  
227 treatment infections, C3HeB/FeJ wild type mice were infected with the SSB-GFP,  $smyc::mCherry$   
228 reporter and infection allowed to establish for six weeks, before commencement of treatment with  
229 10 mg/kg isoniazid (INH), 150 mg/kg pyrazinamide (PZA), or 10 mg/kg rifampicin (RIF) via oral  
230 gavage five times a week for 2 weeks (in a 200  $\mu$ l volume). Control infected mice were mock-  
231 treated with sterile water. All drugs were prepared weekly, and all oral gavage treatments were  
232 carried out under light anesthesia with 2% isoflurane. INH and PZA working solutions were  
233 prepared directly in sterile water. RIF working solution was prepared by diluting 50 mg/ml RIF  
234 stock in DMSO to 10 mg/kg RIF + 5% DMSO in sterile water.

235

### 236 **Confocal immunofluorescence microscopy**

237 Fixed lung lobes were embedded in 4% agarose in PBS and 250  $\mu$ m sections obtained with a Leica  
238 VT1000S vibratome<sup>49</sup>. Staining of tissue was essentially as previously described<sup>12,23,49</sup> – lung  
239 sections were blocked and permeabilized in PBS + 3% BSA + 0.1% Triton X-100 (“blocking  
240 buffer”) for 1 hour at room temperature, before incubation with primary antibodies overnight at  
241 room temperature (all steps on a nutator). The next morning, samples were washed 3 x 5 minutes

242 with blocking buffer, then incubated with secondary antibodies at room temperature for 2 hours  
243 (all steps on a nutator). Samples were washed 3 x 5 minutes with blocking buffer again, and  
244 mounted with Vectashield mounting medium (Vector labs, Burlingame, CA). Rabbit anti-collagen  
245 I (Novus Biologicals, Centennial, CO, catalog #NB600-408) was used at 1:250, and Alexa Fluor  
246 514 goat anti-rabbit (Invitrogen, Carlsbad, CA, catalog #A31558) used at 1:200 for secondary  
247 detection. Rat anti-CD68 (Bio-Rad, Hercules, CA, catalog #MCA1957) and rat anti-Ly6G (BD  
248 Biosciences, San Jose, CA, catalog #551459) were each used at 1:100, and Alexa Fluor 647 goat  
249 anti-rat (Invitrogen, catalog #A21247) used at 1:100 for secondary detection. Nuclei were  
250 visualized with DAPI (1:500; Invitrogen, catalog #D3571). Samples were imaged on a Leica SP8  
251 spectral confocal microscope.

252 For broad xy-plane imaging, the Leica LAS X Navigator module was used to obtain  
253 multiple overlapping images that were then automatically merged together. High resolution images  
254 for reporter quantification were 10  $\mu\text{m}$  in depth, reconstructed into 3D using Volocity software  
255 (Quorum Technologies, Ontario, Canada) from images taken at 0.5  $\mu\text{m}$  z-steps. Quantification of  
256 reporter signal was carried out essentially as previously described using Volocity software<sup>12,23,49</sup>.  
257 In brief, for the *rv2390c*::GFP reporter, the volume of each bacterium was measured via the  
258 mCherry channel, and the corresponding total GFP signal for that given object (bacterium)  
259 simultaneously measured. The settings for the GFP channel were maintained across samples to  
260 allow for comparison of values. Statistical analysis was performed using a Mann-Whitney test for  
261 comparison of reporter signal in bacteria present in the cuff versus core region in each lesion. A  
262 multiple t-test with a Holm-Sidak correction was used for statistical analysis of the binned data of  
263 reporter signal in the cuff versus core across all lesions. The *P<sub>606</sub>*::mKO, *smyc*::mCherry reporter  
264 strain was quantified in the same manner as for the *rv2390c*::GFP reporter. For the SSB-GFP

265 reporter, individual bacteria were identified via the mCherry channel and the number of bacteria  
266 with SSB-GFP puncta determined. Numbers of bacteria quantified in each case are indicated in  
267 the figure legends. Statistical analysis was performed using a Wilcoxon matched-pairs signed rank  
268 test for comparison of lesion cuff versus core values, and with a Mann-Whitney statistical test for  
269 comparing drug to mock treatment in a lesion sublocation.

270

## 271 **DATA AVAILABILITY**

272 All relevant data are within the paper and its supplementary files.

273

## 274 **ACKNOWLEDGEMENTS**

275 We thank Yuzo Kevorkian and Alwyn Ecker for excellent technical assistance, members of the  
276 Tan lab for helpful discussion, and Joan Mecsas for critical reading of the manuscript. This work  
277 was supported by grants R21 AI137759 and R01 AI143768 to ST from the National Institutes of  
278 Health. RCL was supported in part by training grant T32 AI007422 to Ralph R. Isberg from the  
279 National Institutes of Health. Confocal imaging was carried out in the Imaging Core Facility of  
280 the Tufts University Center for Neuroscience Research, supported by grant P30 NS047243 to F.  
281 Rob Jackson from the National Institutes of Health. The funders had no role in study design, data  
282 collection and analysis, decision to publish, or preparation of the manuscript.

283

## 284 **REFERENCES**

285 1 Aldridge, B. B. *et al.* Asymmetry and aging of mycobacterial cells lead to variable growth and  
286 antibiotic susceptibility. *Science* **335**, 100-104 (2012).

- 287 2 Cadena, A. M., Fortune, S. M. & Flynn, J. L. Heterogeneity in tuberculosis. *Nat Rev Immunol*  
288 **17**, 691-702 (2017).
- 289 3 Lanoix, J. P., Lenaerts, A. J. & Nuernberger, E. L. Heterogeneous disease progression and  
290 treatment response in a C3HeB/FeJ mouse model of tuberculosis. *Dis Model Mech* **8**, 603-610  
291 (2015).
- 292 4 Lenaerts, A., Barry, C. E., 3rd & Dartois, V. Heterogeneity in tuberculosis pathology,  
293 microenvironments and therapeutic responses. *Immunol Rev* **264**, 288-307 (2015).
- 294 5 Manina, G., Dhar, N. & McKinney, J. D. Stress and host immunity amplify *Mycobacterium*  
295 *tuberculosis* phenotypic heterogeneity and induce nongrowing metabolically active forms. *Cell*  
296 *Host Microbe* **17**, 32-46 (2015).
- 297 6 Mattila, J. T. *et al.* Microenvironments in tuberculous granulomas are delineated by distinct  
298 populations of macrophage subsets and expression of nitric oxide synthase and arginase  
299 isoforms. *J Immunol* **191**, 773-784 (2013).
- 300 7 Irwin, S. M. *et al.* Presence of multiple lesion types with vastly different microenvironments  
301 in C3HeB/FeJ mice following aerosol infection with *Mycobacterium tuberculosis*. *Dis Model*  
302 *Mech* **8**, 591-602 (2015).
- 303 8 Irwin, S. M. *et al.* Bedaquiline and pyrazinamide treatment responses are affected by  
304 pulmonary lesion heterogeneity in *Mycobacterium tuberculosis* infected C3HeB/FeJ mice.  
305 *ACS Infect Dis* **2**, 251-267 (2016).
- 306 9 Lanoix, J. P. *et al.* Selective inactivity of pyrazinamide against tuberculosis in C3HeB/FeJ  
307 mice is best explained by neutral pH of caseum. *Antimicrob Agents Chemother* **60**, 735-743  
308 (2016).

- 309 10 Pethe, K. *et al.* Isolation of *Mycobacterium tuberculosis* mutants defective in the arrest of  
310 phagosome maturation. *Proc Natl Acad Sci USA* **101**, 13642-13647 (2004).
- 311 11 Rohde, K. H., Abramovitch, R. B. & Russell, D. G. *Mycobacterium tuberculosis* invasion of  
312 macrophages: linking bacterial gene expression to environmental cues. *Cell Host Microbe* **2**,  
313 352-364 (2007).
- 314 12 Tan, S., Sukumar, N., Abramovitch, R. B., Parish, T. & Russell, D. G. *Mycobacterium*  
315 *tuberculosis* responds to chloride and pH as synergistic cues to the immune status of its host  
316 cell. *PLoS Pathog* **9**, e1003282 (2013).
- 317 13 Salfinger, M. & Heifets, L. B. Determination of pyrazinamide MICs for *Mycobacterium*  
318 *tuberculosis* at different pHs by the radiometric method. *Antimicrob Agents Chemother* **32**,  
319 1002-1004 (1988).
- 320 14 Zhang, Y., Scorpio, A., Nikaido, H. & Sun, Z. Role of acid pH and deficient efflux of  
321 pyrazinoic acid in unique susceptibility of *Mycobacterium tuberculosis* to pyrazinamide. *J*  
322 *Bacteriol* **181**, 2044-2049 (1999).
- 323 15 Zhang, Y., Shi, W., Zhang, W. & Mitchison, D. Mechanisms of pyrazinamide action and  
324 resistance. *Microbiol Spectr* **2**, Mgm2-0023-2013 (2014).
- 325 16 Driver, E. R. *et al.* Evaluation of a mouse model of necrotic granuloma formation using  
326 C3HeB/FeJ mice for testing of drugs against *Mycobacterium tuberculosis*. *Antimicrob Agents*  
327 *Chemother* **56**, 3181-3195 (2012).
- 328 17 Irwin, S. M. *et al.* Limited activity of clofazimine as a single drug in a mouse model of  
329 tuberculosis exhibiting caseous necrotic granulomas. *Antimicrob Agents Chemother* **58**, 4026-  
330 4034 (2014).

- 331 18 Lanoix, J. P., Betoudji, F. & Nuermberger, E. Sterilizing activity of pyrazinamide in  
332 combination with first-line drugs in a C3HeB/FeJ mouse model of tuberculosis. *Antimicrob*  
333 *Agents Chemother* **60**, 1091-1096 (2016).
- 334 19 Lavin, R. C. *et al.* Targeting *Mycobacterium tuberculosis* response to environmental cues for  
335 the development of effective antitubercular drugs. *PLoS Biol* **19**, e3001355 (2021).
- 336 20 Ordonez, A. A. *et al.* Matrix metalloproteinase inhibition in a murine model of cavitary  
337 tuberculosis paradoxically worsens pathology. *J Infect Dis* **219**, 633-636 (2019).
- 338 21 Robertson, G. T. *et al.* Spectinamides are effective partner agents for the treatment of  
339 tuberculosis in multiple mouse infection models. *J Antimicrob Chemother* **72**, 770-777 (2017).
- 340 22 Harper, J. *et al.* Mouse model of necrotic tuberculosis granulomas develops hypoxic lesions. *J*  
341 *Infect Dis* **205**, 595-602 (2012).
- 342 23 Sukumar, N., Tan, S., Aldridge, B. B. & Russell, D. G. Exploitation of *Mycobacterium*  
343 *tuberculosis* reporter strains to probe the impact of vaccination at sites of infection. *PLoS*  
344 *Pathog* **10**, e1004394 (2014).
- 345 24 Huang, L., Nazarova, E. V., Tan, S., Liu, Y. & Russell, D. G. Growth of *Mycobacterium*  
346 *tuberculosis in vivo* segregates with host macrophage metabolism and ontogeny. *J Exp Med*  
347 **215**, 1135-1152 (2018).
- 348 25 Caño-Muñiz, S., Anthony, R., Niemann, S. & Alffenaar, J. C. New approaches and therapeutic  
349 options for *Mycobacterium tuberculosis* in a dormant state. *Clin Microbiol Rev* **31**, e00060-17  
350 (2018).
- 351 26 Gomez, J. E. & McKinney, J. D. M. tuberculosis persistence, latency, and drug tolerance.  
352 *Tuberculosis (Edinb)* **84**, 29-44 (2004).



- 353 27 Horsburgh, C. R., Jr., Barry, C. E., 3rd & Lange, C. Treatment of tuberculosis. *N Engl J Med*  
354 **373**, 2149-2160 (2015).
- 355 28 Karakousis, P. C. *et al.* Dormancy phenotype displayed by extracellular *Mycobacterium*  
356 *tuberculosis* within artificial granulomas in mice. *J Exp Med* **200**, 647-657 (2004).
- 357 29 Wayne, L. G. & Sohaskey, C. D. Nonreplicating persistence of *Mycobacterium tuberculosis*.  
358 *Annu Rev Microbiol* **55**, 139-163 (2001).
- 359 30 Huang, L. *et al.* The deconstructed granuloma: a complex high-throughput drug screening  
360 platform for the discovery of host-directed therapeutics against tuberculosis. *Front Cell Infect*  
361 *Microbiol* **8**, 275 (2018).
- 362 31 Martin, C. J. *et al.* Efferocytosis is an innate antibacterial mechanism. *Cell Host Microbe* **12**,  
363 289-300 (2012).
- 364 32 Mouton, J. M., Helaine, S., Holden, D. W. & Sampson, S. L. Elucidating population-wide  
365 mycobacterial replication dynamics at the single-cell level. *Microbiology* **162**, 966-978 (2016).
- 366 33 MacGilvary, N. J. & Tan, S. Fluorescent *Mycobacterium tuberculosis* reporters: illuminating  
367 host-pathogen interactions. *Pathog Dis* **76**, fty017 (2018).
- 368 34 Gandotra, S., Schnappinger, D., Monteleone, M., Hillen, W. & Ehrt, S. *In vivo* gene silencing  
369 identifies the *Mycobacterium tuberculosis* proteasome as essential for the bacteria to persist in  
370 mice. *Nat Med* **13**, 1515-1520 (2007).
- 371 35 Baek, S. H., Li, A. H. & Sassetti, C. M. Metabolic regulation of mycobacterial growth and  
372 antibiotic sensitivity. *PLoS Biol* **9**, e1001065 (2011).
- 373 36 Bellerose, M. M. *et al.* Distinct bacterial pathways influence the efficacy of antibiotics against  
374 *Mycobacterium tuberculosis*. *mSystems* **5**, e00396-20 (2020).

- 375 37 Dhar, N. & McKinney, J. D. *Mycobacterium tuberculosis* persistence mutants identified by  
376 screening in isoniazid-treated mice. *Proc Natl Acad Sci USA* **107**, 12275-12280 (2010).
- 377 38 den Hertog, A. L. *et al.* Pyrazinamide is active against *Mycobacterium tuberculosis* cultures at  
378 neutral pH and low Temperature. *Antimicrob Agents Chemother* **60**, 4956-4960 (2016).
- 379 39 Peterson, N. D., Rosen, B. C., Dillon, N. A. & Baughn, A. D. Uncoupling environmental pH  
380 and intrabacterial acidification from pyrazinamide susceptibility in *Mycobacterium*  
381 *tuberculosis*. *Antimicrob Agents Chemother* **59**, 7320-7326 (2015).
- 382 40 Levin, M. E. & Hatfull, G. F. *Mycobacterium smegmatis* RNA polymerase: DNA supercoiling,  
383 action of rifampicin and mechanism of rifampicin resistance. *Mol Microbiol* **8**, 277-285 (1993).
- 384 41 Boyaci, H., Saecker, R. M. & Campbell, E. A. Transcription initiation in mycobacteria: a  
385 biophysical perspective. *Transcription* **11**, 53-65 (2020).
- 386 42 Somoskovi, A., Parsons, L. M. & Salfinger, M. The molecular basis of resistance to isoniazid,  
387 rifampin, and pyrazinamide in *Mycobacterium tuberculosis*. *Respir Res* **2**, 164-168 (2001).
- 388 43 Via, L. E. *et al.* Tuberculous granulomas are hypoxic in guinea pigs, rabbits, and nonhuman  
389 primates. *Infect Immun* **76**, 2333-2340 (2008).
- 390 44 Bhaskar, A. *et al.* Reengineering redox sensitive GFP to measure mycothiol redox potential of  
391 *Mycobacterium tuberculosis* during infection. *PLoS Pathog* **10**, e1003902 (2014).
- 392 45 Jain, P. *et al.* Dual-reporter mycobacteriophages ( $\Phi$ 2DRMs) reveal preexisting *Mycobacterium*  
393 *tuberculosis* persistent cells in human sputum. *mBio* **7**, e01023-16 (2016).
- 394 46 MacGilvary, N. J., Kevorkian, Y. L. & Tan, S. Potassium response and homeostasis in  
395 *Mycobacterium tuberculosis* modulates environmental adaptation and is important for host  
396 colonization. *PLoS Pathog* **15**, e1007591 (2019).

- 397 47 Nazarova, E. V. *et al.* Rv3723/LucA coordinates fatty acid and cholesterol uptake in  
398 *Mycobacterium tuberculosis*. *Elife* **6**, e26969 (2017).
- 399 48 Kim, J. H. *et al.* A genetic strategy to identify targets for the development of drugs that prevent  
400 bacterial persistence. *Proc Natl Acad Sci USA* **110**, 19095-19100 (2013).
- 401 49 Giacalone, D., Huang, L. & Tan, S. Exploiting fluorescent proteins to understand  
402 *Mycobacterium tuberculosis* biology. *Methods Mol Biol* **2314**, 365-383 (2021).

Figure 1

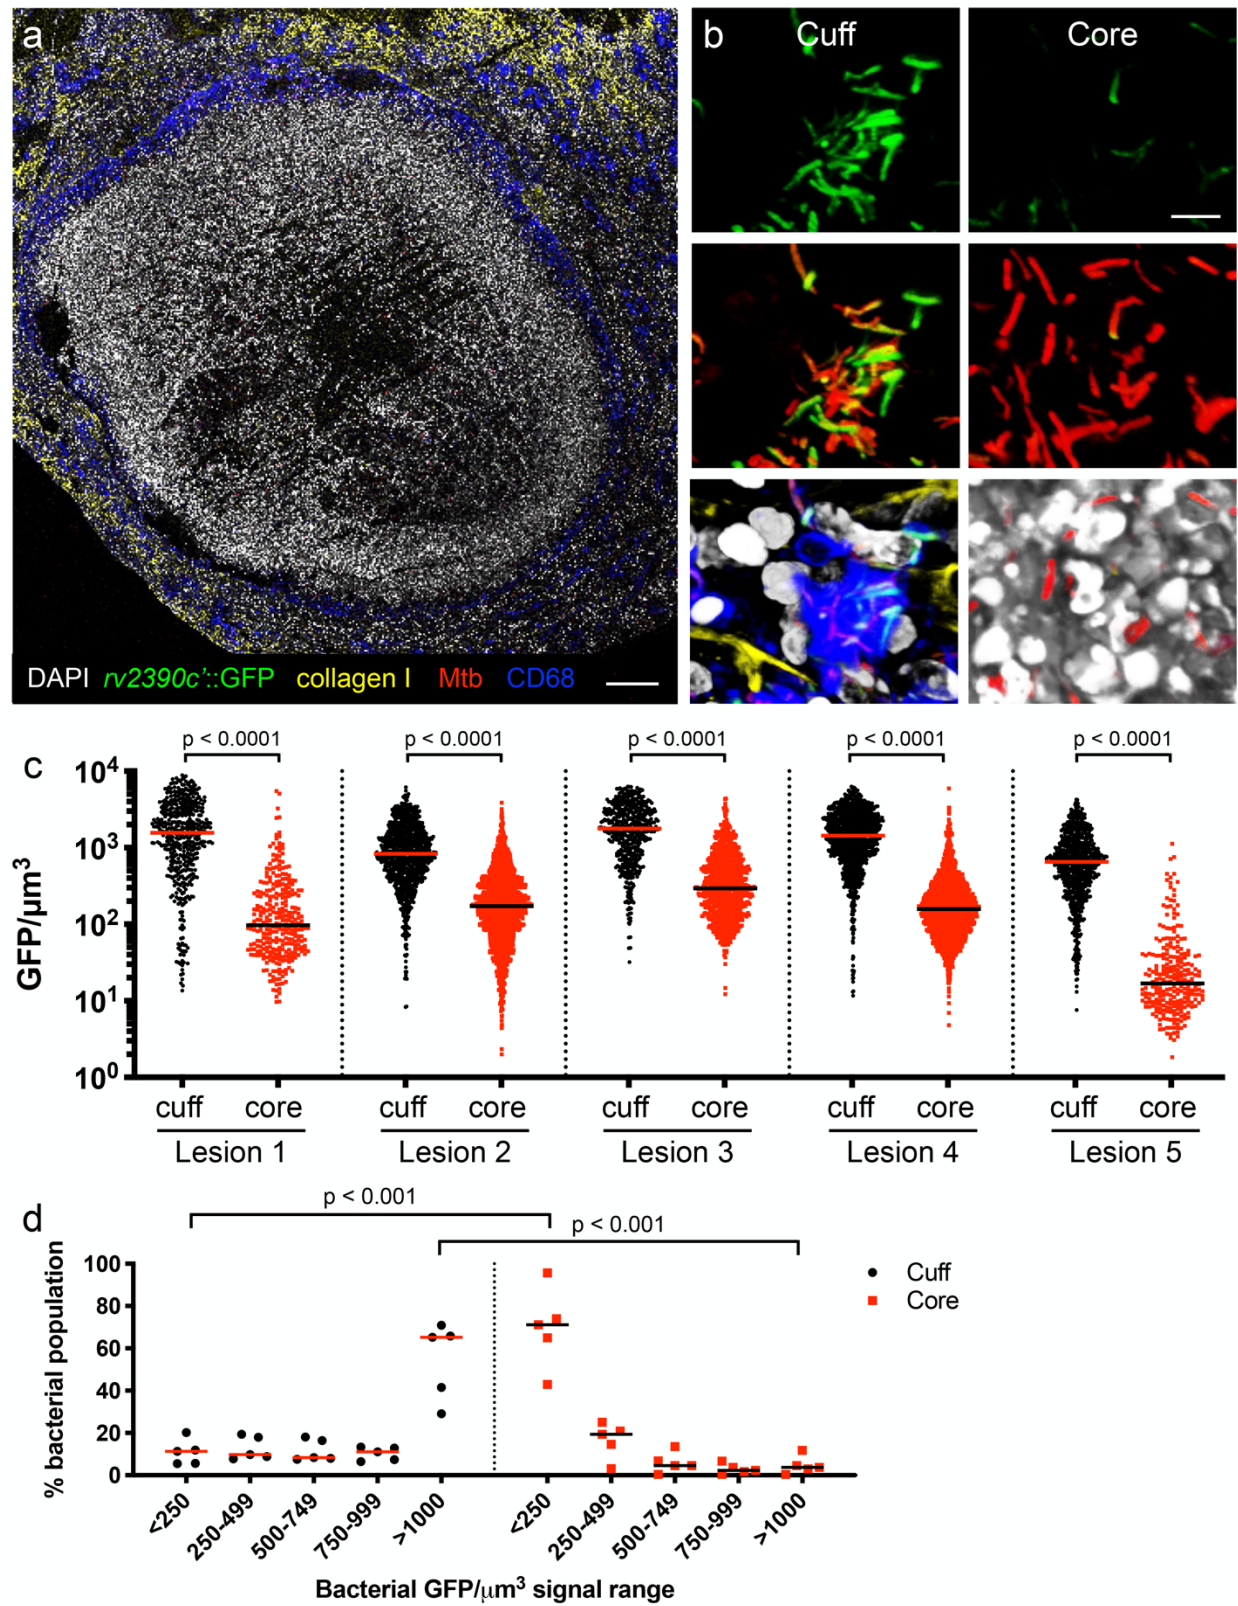

**Fig. 1. *rv2390c'*::GFP reporter reveals heterogeneity in pH/Cl<sup>-</sup> levels within different sublocations of caseous necrotic lesions.** (a and b) Confocal microscopy images of type I caseous necrotic lesions from 6-8 week infection of C3HeB/FeJ mice with Erdman (*rv2390c'*::GFP, *smyc'*::mCherry). Overview image of a lesion (~10 x 11 tiled image) is shown in (a), and representative 3D confocal images from the lesion cuff and core shown in (b). All bacteria are marked in red (*smyc'*::mCherry), reporter signal is shown in green (*rv2390c'*::GFP), nuclei are shown in grayscale (DAPI), collagen I is shown in yellow, and macrophages are shown in blue (CD68). Scale bar 200  $\mu\text{m}$  in (a) and 5  $\mu\text{m}$  in (b). (c) shows GFP/ $\mu\text{m}^3$  signal for individual bacteria or a group of tightly clustered bacteria, quantified from multiple 3D confocal images at each lesion sublocation (5 different lesions from 5 mice; number of bacteria quantified was respectively 478, 307, 937, 1715, 516, 885, 1078, 1755, 749, and 257 for each lesion sublocation as shown from left to right on the graph). Horizontal lines mark the median value for each sample. p-values were obtained with a Mann-Whitney statistical test. (d) shows data from (c) binned into 5 sub-ranges of GFP/ $\mu\text{m}^3$  signal. Each point on the graph represents one lesion. Horizontal lines mark the median value for each group. p-values were obtained with a multiple t-test with a Holm-Sidak correction.

Figure 2

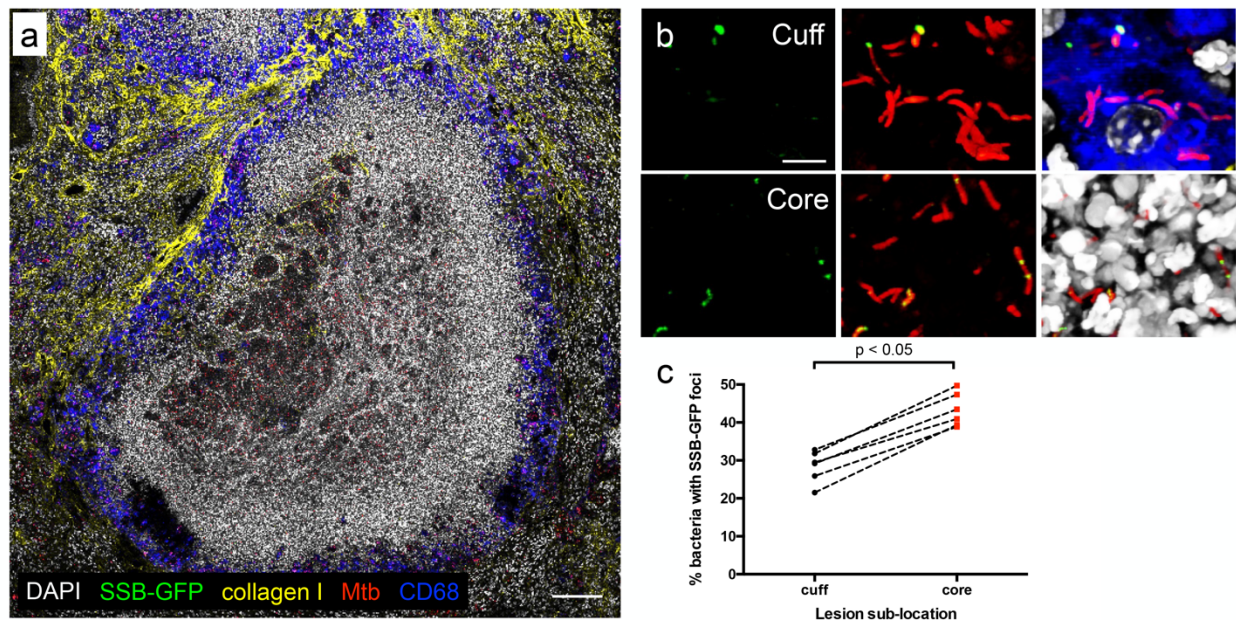

**Fig. 2. SSB-GFP reporter reveals heterogeneity in bacterial replication within different sublocations of caseous necrotic lesions.** (a and b) Confocal microscopy images of type I caseous necrotic lesions from 6 week infection of C3HeB/FeJ mice with Erdman (SSB-GFP, *smyc*'::mCherry). Overview image of a lesion (~5 x 5 tiled image) is shown in (a), and representative 3D confocal images from the lesion cuff and core are shown in (b). All bacteria are marked in red (*smyc*'::mCherry), reporter signal is shown in green (SSB-GFP), nuclei are shown in grayscale (DAPI), collagen I is shown in yellow, and macrophages are shown in blue (CD68). For clarity of foci visualization, SSB-GFP signal is shown in extended focus, overlaid on the 3D images in (b). Scale bar 100  $\mu$ m in (a) and 5  $\mu$ m in (b). (c) shows the percentage of Mtb displaying SSB-GFP foci in each lesion sublocation for each quantified lesion measured from multiple 3D confocal images (6 different lesions from 5 mice; number of bacteria quantified in each lesion sublocation [cuff, core] was [678, 475], [564, 545], [370, 446], [478, 1248], [537, 867], and [393, 360]). p-value was obtained using a Wilcoxon matched-pairs signed rank test.

**Figure 3**

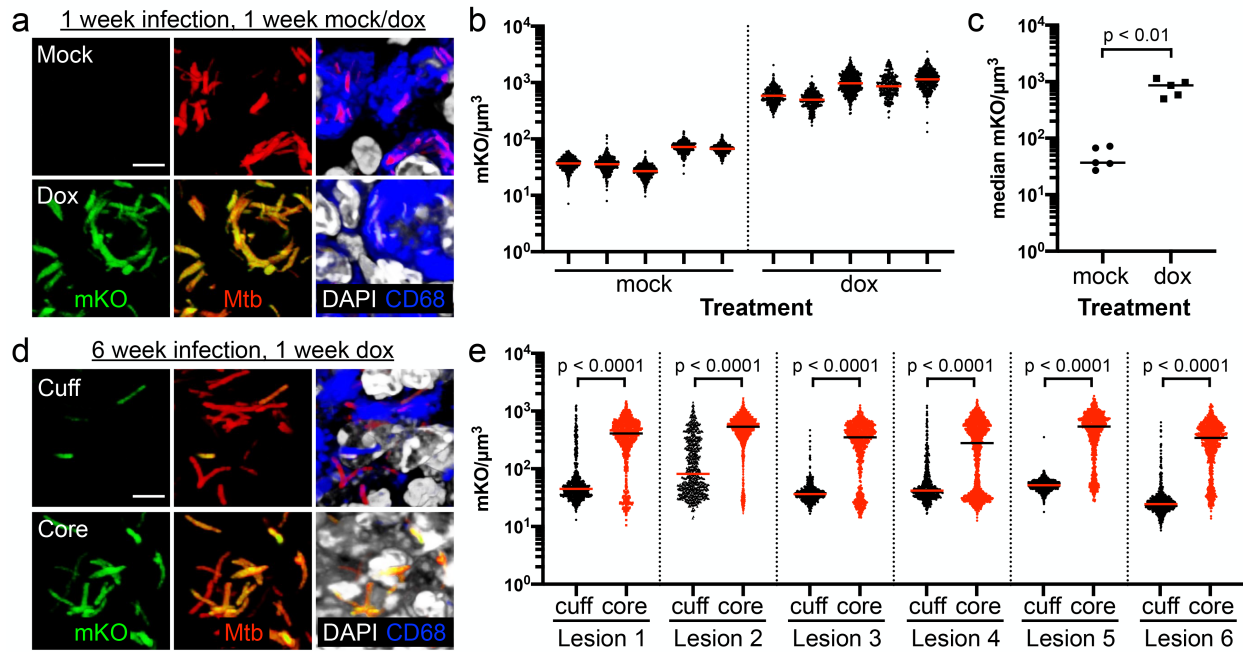

**Fig. 3. Heterogeneity in bacterial transcriptional/translational activity within different sublocations of caseous necrotic lesions.** (a) Representative 3D confocal images from the lesion cuff and core from a 1 week infection of C3HeB/FeJ mice with Erdman ( $P_{606}'::mKO\text{-tetON}$ ,  $smyc'::mCherry$ ), followed by 1 week of exposure to drinking water  $\pm$  1 mg/ml doxycycline. All bacteria are marked in red ( $smyc'::mCherry$ ), reporter signal is shown in green ( $P_{606}'::mKO\text{-tetON}$ ), nuclei are shown in grayscale (DAPI), and macrophages are shown in blue (CD68). Scale bar 5  $\mu\text{m}$ . (b) mKO/ $\mu\text{m}^3$  signal for individual bacteria or a group of tightly clustered bacteria, quantified from multiple 3D confocal images from infections as performed in (a) (5 different mice/treatment group; number of bacteria quantified from each sample was respectively 440, 424, 604, 379, 436, 355, 330, 545, 257, and 425 as shown from left to right on the graph). Horizontal lines mark the median value for each sample. (c) graphs the medians of each sample shown in (b), with p-value obtained with a Mann-Whitney statistical test. (d) Representative 3D confocal images from the lesion cuff and core from a 6 week infection of C3HeB/FeJ mice with Erdman

( $P_{606}'::mKO-tetON$ ,  $smyc'::mCherry$ ), followed by 1 week of exposure to drinking water + 1 mg/ml doxycycline. All bacteria are marked in red ( $smyc'::mCherry$ ), reporter signal is shown in green ( $P_{606}'::mKO-tetON$ ), nuclei are shown in grayscale (DAPI), and macrophages are shown in blue (CD68). Scale bar 5  $\mu m$ . (e)  $mKO/\mu m^3$  signal for individual bacteria or a group of tightly clustered bacteria, quantified from multiple 3D confocal images at each lesion sublocation (6 different lesions from 5 mice; number of bacteria quantified was respectively 612, 745, 728, 1802, 488, 913, 636, 1615, 1527, 1058, 599, and 921, for each lesion sublocation as shown from left to right on the graph). Horizontal lines mark the median value for each sample. p-values were obtained with a Mann-Whitney statistical test.



Figure 4

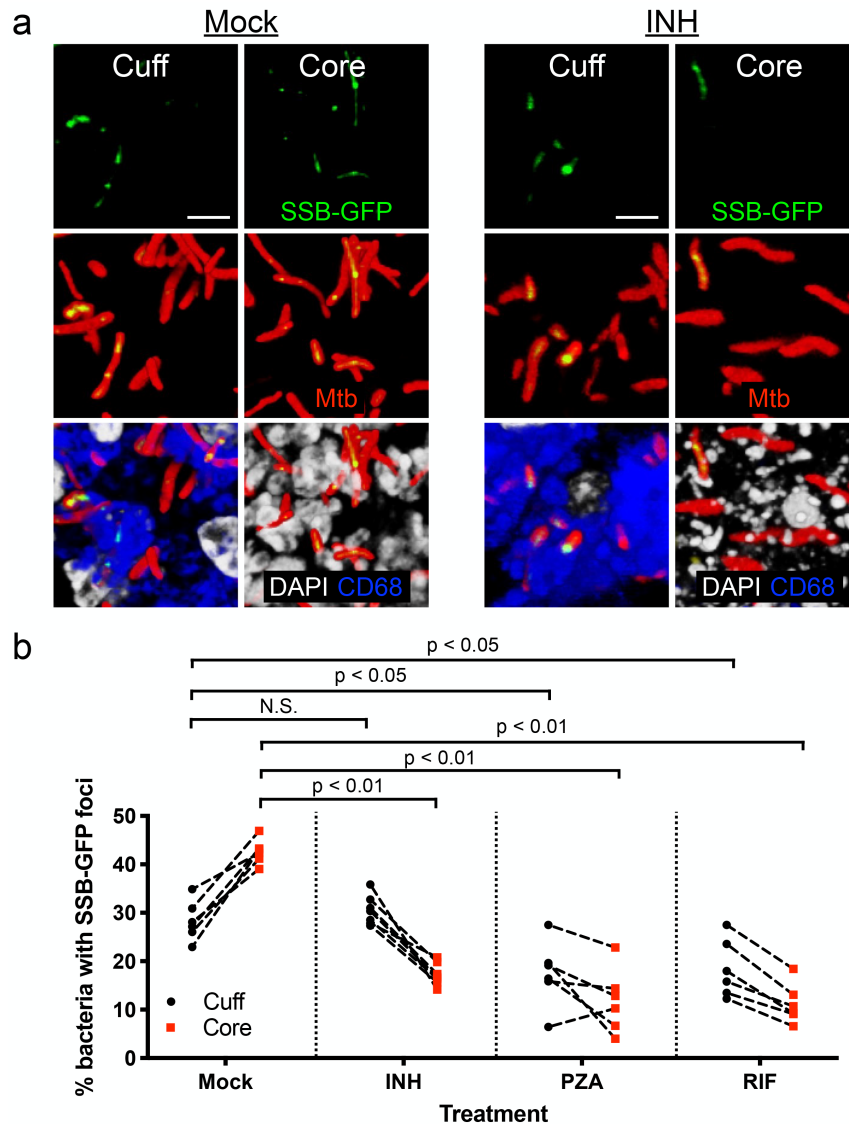

**Fig. 4. Impact of bacterial sublocation within caseous necrotic lesions on efficacy of first-line antitubercular drugs.** (a) Representative 3D confocal images from the lesion cuff and core from a 6 week infection of C3HeB/FeJ mice with Erdman (SSB-GFP, *smyc*'::mCherry), followed by 2 weeks of mock or 10 mg/kg isoniazid (INH) treatment. All bacteria are marked in red (*smyc*'::mCherry), reporter signal is shown in green (SSB-GFP), nuclei are shown in grayscale (DAPI), and macrophages are shown in blue (CD68). For clarity of foci visualization, SSB-GFP signal is shown in extended focus, overlaid on the 3D images. Scale bar 5  $\mu$ m. (b) shows the

percentage of Mtb displaying SSB-GFP foci in each lesion sublocation for each quantified lesion, measured from multiple 3D confocal images for each set of 6 week infections followed by 2 weeks of mock, 10 mg/kg INH, 150 mg/kg pyrazinamide (PZA), or 10 mg/kg rifampicin (RIF) treatment. p-values were obtained with a Mann-Whitney statistical test. Sample details are as follows: mock treatment set – 6 different lesions from 5 mice; number of bacteria quantified in each lesion sublocation [cuff, core] was [641, 891], [481, 389], [408, 339], [318, 367], [447, 425], and [541, 453]. INH treatment set – 7 different lesions from 4 mice; number of bacteria quantified in each lesion sublocation [cuff, core] was [319, 371], [371, 467], [417, 385], [450, 403], [412, 419], [339, 311], and [368, 339]. PZA treatment set – 6 different lesions from 5 mice; number of bacteria quantified in each lesion sublocation [cuff, core] was [219, 210], [423, 626], [418, 543], [248, 419], [285, 366], and [341, 375]. RIF treatment set – 6 different lesions from 4 mice; number of bacteria quantified in each lesion sublocation [cuff, core] was [215, 297], [300, 151], [246, 275], [212, 122], [318, 378], and [367, 215].
